# Supplementary material for: Photoluminescent and cytotoxic properties of multinuclear complexes and multinuclear-based polymers with group 12 metals and a tripodal ligand
Source: Royal Society of Chemistry journal article supplement (doi:10.1039/c5nj00222b), 2015-01-01
Supplement: c5nj00222b1.pdf [file c5nj00222b1.pdf]

## Supporting Information

*For NJ-ART-01-2015-000222.R1*

### **Photoluminescent and Cytotoxic Properties of Multinuclear Complexes and Multinuclear-based Polymers with Group 12 Metals and Tripodal Ligand**

Jin'an Zhao,<sup>\*a</sup> Kun Peng,<sup>b</sup> Yan Guo,<sup>b</sup> Jin Zhang,<sup>b</sup> Shufang Chen,<sup>a</sup> and Jiyong Hu<sup>\*a</sup>

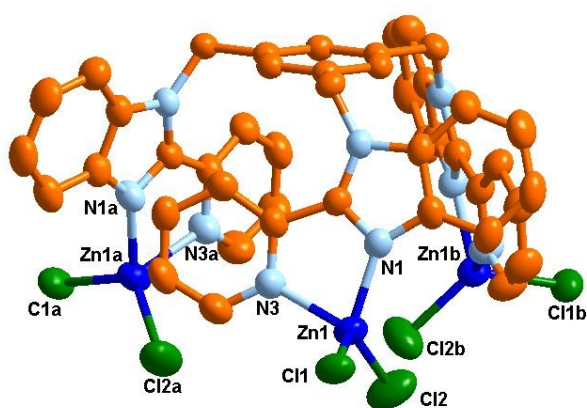

**Fig. S1** The structure of **1** presented as thermal ellipsoid model.

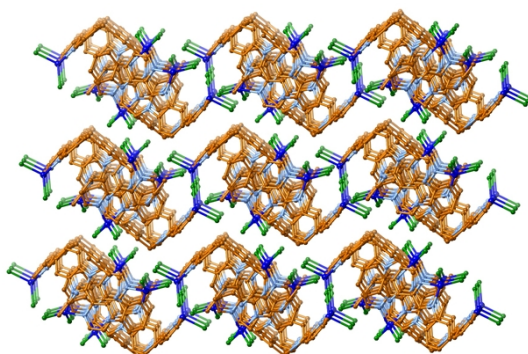

**Fig. S2** View of 3D supramolecular structure of **1** stabilized by hydrogen-bonding and  $\pi \cdots \pi$  interactions (Symmetry codes:  $^A4/3-y, 2/3+x-y, -1/3+z; 1-x, 1-y, 1-z$ ).

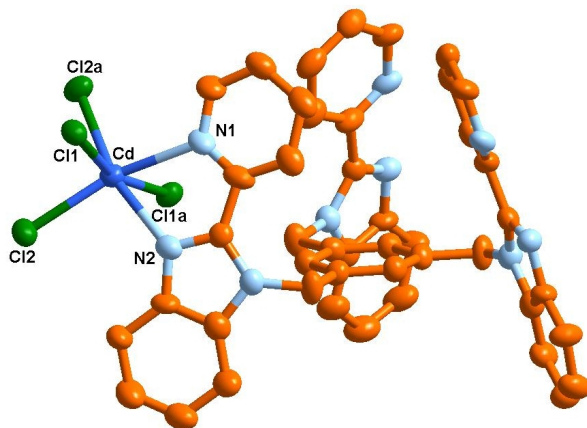

**Fig. S3** The coordination environment of **2** presented as thermal ellipsoid model.

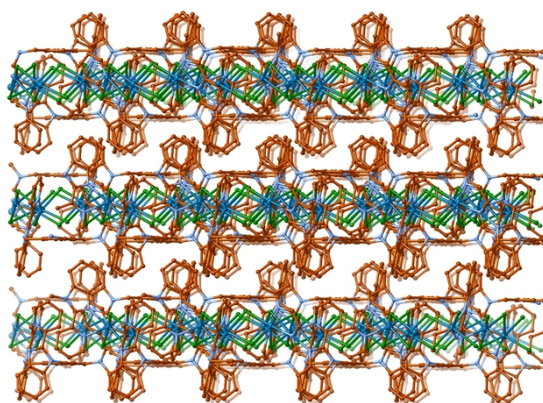

**Fig. S4** View of 3D supramolecular structure of **2** stabilized by hydrogen-bonding and  $\pi \cdots \pi$  interactions (Symmetry codes:  $^A 4/3 - y, 2/3 + x - y, -1/3 + z$ ;  $^B 5/3 - x, 4/3 - y, 4/3 - z$ ;  $^C 2 - y, 1 + x - y, z$ ;  $5/3 - x, 4/3 - y, 4/3 - z$ ).

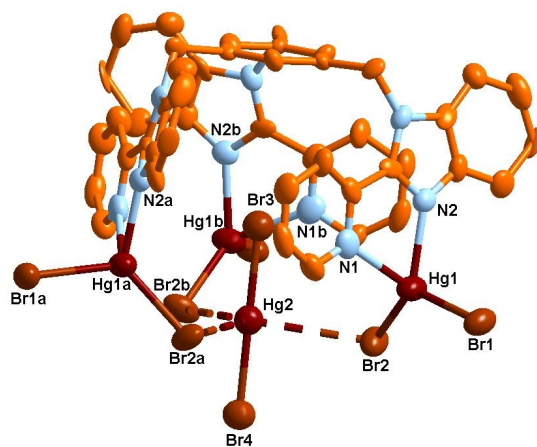

**Fig. S5** The structure of **3** presented as thermal ellipsoid model.

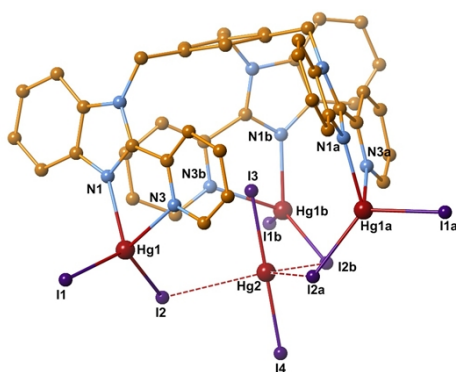

**Fig. S6** The tetranuclear framework of complex **4** (all hydrogen atoms are omitted for clarity).

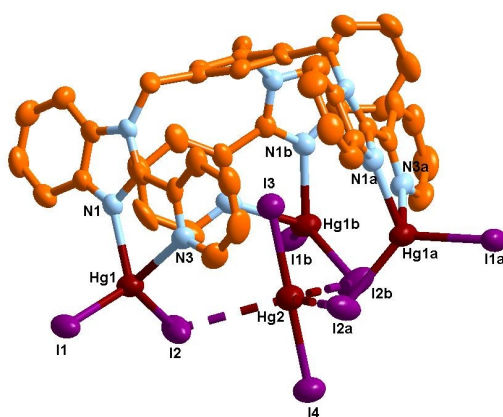

**Fig. S7** The structure of **4** presented as thermal ellipsoid model.

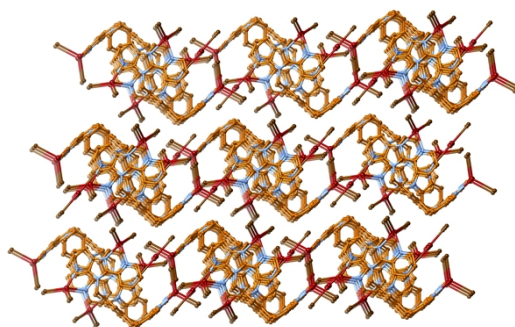

**Fig. S8** View of 3D supramolecular structure of **3** stabilized by hydrogen-bonding and  $\pi \cdots \pi$  interactions (Symmetry codes:  $\frac{1}{2}/3-y$ ,  $\frac{1}{3}+x-y$ ,  $\frac{1}{3}+z$ ;  $1-x$ ,  $1-y$ ,  $1-z$ ).

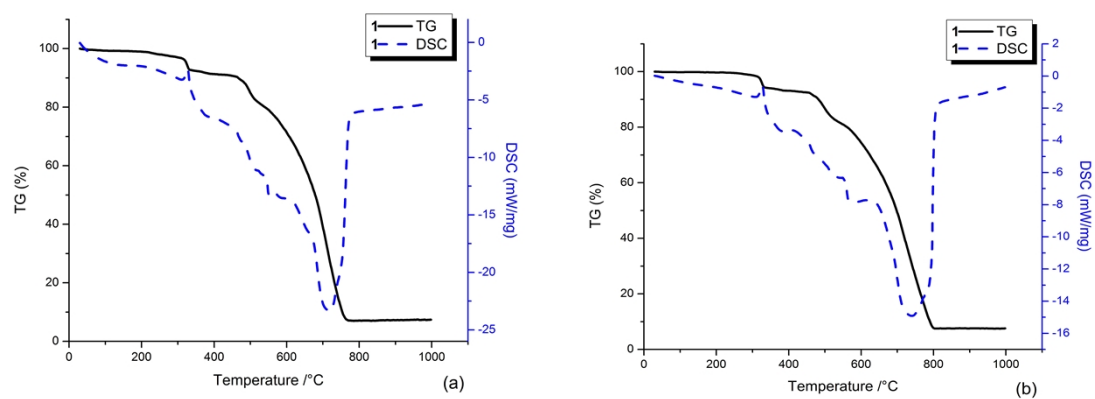

**Fig. S9** (a) The TG and DSC curves of complex **1** with solvent molecular; (b) The TG and DSC curves of complex **1** without solvent molecular.

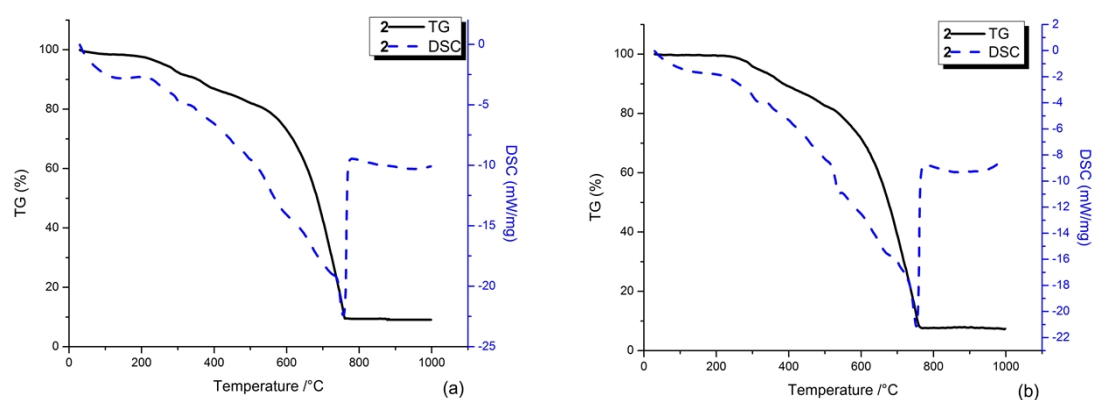

**Fig. S10** (a) The TG and DSC curves of complex **2** with solvent molecular; (b) The TG and DSC curves of complex **2** without solvent molecular.

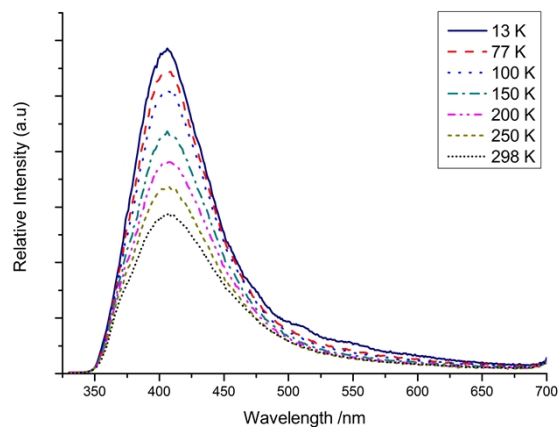

**Fig. S11** The photoluminescence emission spectra of ligand tpbb ( $\lambda_{\text{exc}} = 349$  nm) in the solid state at 298 K and cryogenic temperatures.

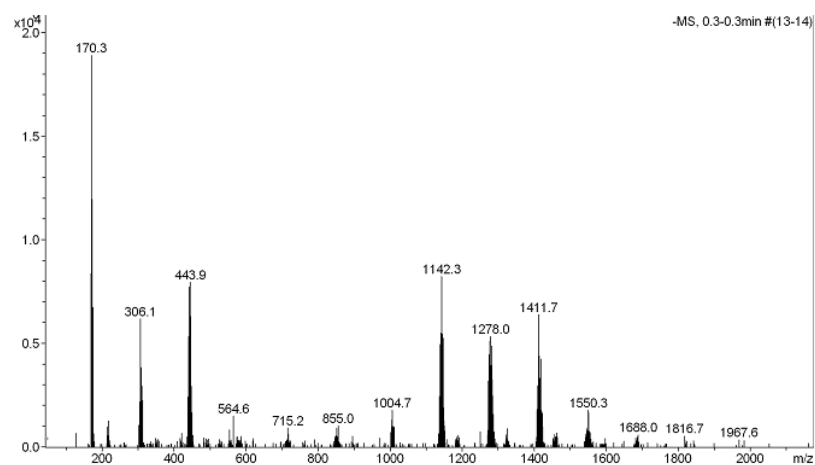

**Fig. S12** ESI-MS spectrum of complex **1**.
